# A distributed algorithm to maintain and repair the trail networks of arboreal ants

Arjun Chandrasekhar<sup>1</sup>, Deborah M. Gordon<sup>\*2</sup>, and Saket Navlakha<sup>\*1</sup>

<sup>1</sup>The Salk Institute for Biological Studies, Integrative Biology Laboratory, La Jolla, CA 92037 USA

<sup>2</sup>Stanford University, Department of Biology, Stanford, CA 94035 USA

## Abstract

We study how the arboreal turtle ant (*Cephalotes goniodontus*) solves a fundamental computing problem: maintaining a trail network and finding alternative paths to route around broken links in the network. Turtle ants form a routing backbone of foraging trails linking several nests and temporary food sources. This species travels only in the trees, so their foraging trails are constrained to lie on a natural graph formed by overlapping branches and vines in the tangled canopy. Links between branches, however, can be ephemeral, easily destroyed by wind, rain, or animal movements. Here we report a biologically feasible distributed algorithm, parameterized using field data, that can plausibly describe how turtle ants maintain the routing backbone and find alternative paths to circumvent broken links in the backbone. We validate the ability of this probabilistic algorithm to circumvent simulated breaks in synthetic and real-world networks, and we derive an analytic explanation for why certain features are crucial to improve the algorithm's success. Our proposed algorithm uses fewer computational resources than common distributed graph search algorithms, and thus may be useful in other domains, such as for swarm computing or for coordinating molecular robots.

## Introduction

Distributed algorithms allow a collection of agents to efficiently solve computational problems without centralized control [1]. Recent research has uncovered such algorithms implemented by many biological systems, including slime molds during foraging [2] and neural circuits during development [3]. Ants are a diverse taxon of more than 14,000 species that have also evolved distributed algorithms to establish trail networks [4]. Investigating the algorithms used by biological systems can reveal novel solutions to engineering problems [5, 3].

Here we present the first computational analysis, parameterized using data from field observations, of trail networks of an arboreal ant species. The arboreal turtle ant *C. goniodontus* nests and forages in the trees in the tropical dry forest of western Mexico [6]. Because the ants never leave the trees, their foraging trails are constrained by a natural graph: branches and vines form the edges in the graph, and junctions at overlapping branches form the nodes (Figure 1A–C). Each colony has

---

\*Corresponding authors: [dmgordon@stanford.edu](mailto:dmgordon@stanford.edu), [navlakha@salk.edu](mailto:navlakha@salk.edu)

28 several nests, located in dead tree branches, that are connected to each other in a circuit or network  
29 routing backbone [4, 7, 8]. Moving on the trails along this backbone, the ants distribute resources  
30 among the juveniles, workers, and reproductives in all of the nests, while additional temporary  
31 trails split from the backbone and lead to food sources. The backbone trail network can be large,  
32 often extending over 50 meters in circumference, and encompassing numerous trees [6]. The ants  
33 use many junctions in dense vegetation, so trails can be tortuous; each meter of linear distance  
34 typically requires ants to traverse approximately 2–5 meters of vegetation [6]. The colony thus  
35 chooses paths in the network from a myriad of potential routes, dictated by the graph structure of  
36 the vegetation. Ants lay trail pheromone as they move along the edges, and ants use pheromone  
37 when choosing edges.

38 We present a distributed algorithm that can plausibly describe how turtle ants maintain and  
39 repair breaks to their routing backbone. Links between branches or vines can be ephemeral, often  
40 disrupted by wind, rain, or the movement of an animal through the vegetation. To re-establish con-  
41 nectivity of the routing backbone after a break, the ants must establish a new path that reconnects  
42 the two sides of the broken trail. This is an important problem in many network applications [9]  
43 and can be solved efficiently using numerous graph algorithms, such as Dijkstra’s algorithm or the  
44 Bellman-Ford algorithm [10]. However, these classic algorithms require significantly more com-  
45 putation and memory than is likely available to simple biological agents such as turtle ants, who  
46 regulate their behavior using local interactions rather than central control [11].

47 Repairing breaks requires overcoming three challenges. First, the ants must succeed in finding  
48 an alternative path by exploring new edges that currently have no pheromone and avoiding dead-  
49 ends in the network. One hypothesis for how this could be achieved is to first generate many  
50 candidate alternative paths and then converge to one or a few of them over time — a process  
51 we call “pruning”. Such a strategy, also employed by slime molds [2] and neural circuits [3], has  
52 been shown to help quickly discover new paths in distributed settings, in which no agent is aware  
53 of the topology of the entire network. Second, all ants must converge to the same new path in  
54 order to optimally coordinate resource transport. Turtle ants travel in coherent trails that link  
55 nests and food sources [12]. After the vegetation supporting the trail is ruptured, the ants explore  
56 outside the previous path, and eventually commit again to a single path. Such convergence prevents  
57 ants from getting lost or separated from the rest of the colony. This is also an important goal in  
58 computer routing networks, where convergence to a single path ensures in-order delivery of data  
59 packets [13]. Third, it may be important to minimize the length of the new trail, which is also a  
60 standard measure of efficiency used when evaluating transport network design. However, data from  
61 field studies [6, 12] suggest that turtle ant paths are often not the shortest globally. It appears  
62 that the second objective, successful convergence, is more important than minimizing trail length,  
63 presumably because ants getting lost or separated has a higher cost than the energy spent in  
64 walking [12]. A common strategy to increase robustness to edge failures in a graph is to include  
65 loops in the path. Prior work [12] showed that loops do form in turtle ant trail networks; however,  
66 loops tend to get pruned over time, perhaps reducing the number of foragers needed to maintain  
67 the path.

68 The distributed algorithm used to maintain and repair trail networks must be robust across  
69 varying planar network topologies. The forest canopy is highly complex and dynamic, and it is un-  
70 likely that turtle ants use different algorithms to accommodate different network structures. Thus,  
71 we seek an algorithm that, while likely not “optimal” for any single planar topology, performs  
72 well across different planar topologies. The algorithm must also use very limited memory of indi-

73 vidual agents, as ants are not capable of remembering many of their steps along the graph structure.

74

75 Our work seeks to uncover a biologically plausible distributed algorithm that corresponds with  
76 field observations of turtle ant behavior in response to experimentally-induced edge breaks (Fig-  
77 ure 1B) [12]. We ask:

78 1. What model is most likely to explain how turtle ants at a node select which edge to traverse  
79 next?

80 2. How well can the algorithm repair broken trails in simulated breaks in synthetic and real-  
81 world network topologies when parameterized by the most biologically realistic parameter  
82 values?

83 (a) Does the algorithm consistently converge to a single consensus path?

84 (b) Does the algorithm find short paths?

85 (c) Does bi-directional search, using ants from both sides of the broken path concurrently,  
86 improve the performance of the algorithm relative to uni-directional search?

87 (d) How does allowing an ant to avoid going back to the node it previously visited (back-  
88 tracking), improve algorithm performance relative to performance when ants are not  
89 prevented from backtracking?

90 (e) Can we provide any theoretical insights into why certain model features are necessary  
91 for any plausible turtle ant algorithm?

92 3. Can the same algorithm used to repair breaks also be used to keep the established routing  
93 backbone intact in the absence of a break?

94 4. Do turtle ants form multiple alternative paths and then prune some of them over time, as  
95 also observed in field studies?

96 A model that performs well on all of these criteria can be considered a plausible model of turtle ant  
97 behavior. Our main contribution is to identify several plausible non-linear models; we also show  
98 why one common linear model is likely implausible despite succeeding on some of the criteria listed  
99 above.

## 100 Related work

101 To our knowledge, this is the first computational analysis of trail networks of an arboreal ant  
102 species, whose movements are constrained to a discrete graph structure rather than continuous  
103 space. Compared to previous work, we attempt to solve the network repair problem using different  
104 constraints and fewer assumptions about the computational abilities of individual ants.

105

106 **Species-specific modeling of ant behavior.** Previous studies of ant trail networks have largely  
107 examined species that forage on a continuous 2D surface [14], including Pharaoh's ants [15], Argen-  
108 tine ants [4, 16, 17], leaf-cutter ants [18], army ants [19], and red wood ants [20]. These species can  
109 define nodes and edges at any location on the surface, and form trails using techniques such as ran-  
110 dom amplification [21, 22, 19], or using their own bodies to form living bridges [23]. Experimental

111 work on these species sometimes uses discrete mazes or Y-junctions to impose a graph structure;  
112 however, these species have evolved to create graph structures in continuous space, not to solve  
113 problems on a fixed graph structure, as turtle ants have evolved to do. Turtle ant movements are  
114 entirely constrained by the vegetation in which they travel. They cannot form trails with nodes  
115 and edges at arbitrary locations; instead, they can use only the nodes and edges that are available  
116 to them.

117 Further, to provide the simplest possible algorithm that is biologically realistic, we assume that  
118 turtle ants use only one type of pheromone. There are more than 14,000 species of ants, and they  
119 differ in their use of chemical cues. For example, *Monomorium pharoensis* uses several different  
120 trail pheromones [24, 25, 26, 27, 28]. There is, however, no evidence that turtle ants lay more than  
121 one type of trail pheromone.

122

123 **Ant colony optimization.** Models of ant colony optimization (ACO), first proposed in 1991,  
124 loosely mimic ant behavior to solve combinatorial optimization problems, such as the traveling  
125 salesman problem [29, 30, 31]. In ACO, individual ants each use a heuristic to construct candidate  
126 solutions, and then use pheromone to lead other ants towards higher quality solutions. Recent  
127 advances improve ACO through techniques such as local search [32], cunning ants [33], and iterated  
128 ants [34]. ACO, however, provides simulated ants more computational power than turtle actually  
129 ants possess; in particular, ACO-simulated ants have sufficient memory to remember, retrace, and  
130 reinforce entire paths or solutions, and they can choose how much pheromone to lay in retrospect,  
131 based on the optimality of the solution.

132 Prior work inspired by ants provides solutions to graph search problems [35, 36], such as the  
133 Hamiltonian path problem [37] or the Ants Nearby Treasure Search (ANTS) problem. The latter  
134 investigates how simulated ants collaboratively search the integer plane for a treasure source. These  
135 models afford the simulated ants various computational abilities, including searching exhaustively  
136 around a fixed radius [38], sending constant sized messages [39], or laying pheromone to mark an  
137 edge as explored [40]. Our work involves a similar model of distributed computation, but our prob-  
138 lem requires not only that the ants find an alternative path to a nest (a “treasure”), but also that  
139 all the ants commit to using the same alternative path. This requires a fundamentally different  
140 strategy from that required for just one ant to find a treasure.

141

142 **Graph algorithms and reinforced random walks.** Common algorithms used to solve the  
143 general network search and repair problem, including Dijkstra’s algorithm, breadth-first search,  
144 depth-first search, and A\* search [10], all require substantial communication or memory com-  
145 plexity. For example, agents must maintain a large routing table, store and query a list of all  
146 previously visited nodes, or pre-compute a topology-dependent heuristic to compute node-to-node  
147 distances [41]. These abilities are all unlikely for turtle ants.

148 Distributed graph algorithms, in which nodes are treated as fixed agents capable of passing  
149 messages to neighbors, have also been proposed to find shortest paths in a graph [42, 43], to  
150 construct minimum spanning trees [44, 45], and to approximate various NP-hard problems [46, 47].  
151 In contrast, our work uses a more restrictive model of distributed computation, where agents  
152 communicate only through pheromone which does not have a specific targeted recipient.

153 Finally, the limited assumptions about the memory of turtle ants invite comparison to a Markov  
154 process. Edge-reinforced random walks [48], first introduced by Diaconis and others [49, 50], proceed  
155 as follows: an agent, or random walker, traverses a graph by choosing amongst adjacent edges with

156 a probability proportional to their edge weight; then the agent augments the weight (or pheromone)  
157 of each edge chosen. Our model expands edge-reinforced random walks in two ways: first, we allow  
158 many agents to walk the graph concurrently, and second, we decrease edge weights over time.  
159 Our work is similar to previous models of the gliding behavior of myxobacteria [51] that consider  
160 synchronous, node (rather than edge)-reinforced, random walks with decay. These models seek  
161 to determine when bacteria aggregate on adjacent points or instead walk freely on the grid. By  
162 contrast, here we ask whether the random walkers converge to a single consensus path between two  
163 points on the grid that are not necessarily adjacent.

## 164 Results

165 Our goals are to find an algorithm that can simultaneously explain the movement patterns of turtle  
166 ants on a trail network and that can effectively solve the network repair problem. First, we describe  
167 a computational framework for evaluating the collective response of turtle ants to edge ruptures.  
168 We evaluate the response according to three objectives: the likelihood of finding an alternative path  
169 to repair the trail, how well the ants converge to the same new trail, and the capacity to minimize  
170 the length of the trail. Second, we derive multiple candidate distributed algorithms for network  
171 repair. We parameterize each algorithm using data from field experiments to determine how the  
172 model would predict which edge a turtle ant would choose to traverse next from a node, given only  
173 local information about adjacent edges and their edge weights. Third, we analyze via simulation  
174 how our algorithms perform on different planar network topologies, including simulated breaks on  
175 a European road transport network.

### 176 A graph-theoretic framework for modeling network repair by turtle ants

177 We start with a weighted, undirected graph  $G = (V, E, W)$ , where  $V$  is the node set,  $E$  is the edge  
178 set, and  $W$  are the edge weights, as well as two nest nodes  $u, v \in V$ , and a path  $P = (u, \dots, v)$   
179 from  $u$  to  $v$  with pheromone along each edge in  $P$ . Edges are undirected since turtle ants can walk  
180 in both directions over edges. Edge weights correspond to the amount of pheromone on the edges,  
181 which can change over time. We mimic a break in the path by removing some edge in  $P$ . The  
182 challenge for the ants is to find an alternative path that reconnects  $u$  and  $v$ . The alternative path  
183 may build off the existing path, so that the initial and final path may share some edges.

184 Communication among simulated ants is limited to chemical signals, analogous to pheromone,  
185 left on edges traversed. Field observations are consistent with the assumption that, like Argentine  
186 ants [52], turtle ants lay trail pheromone continuously as they walk [6, 12]. Though this has not  
187 been observed directly, we hypothesize that there are certain exceptional situations in which turtle  
188 ants discontinue laying pheromone (Methods). Each ant at a node senses the pheromone level on  
189 adjacent edges to inform its next movement. Observations suggest that a turtle ant tends to keep  
190 moving in the same direction, indicating that an ant is able to avoid the previous node it visited.  
191 We thus assume that simulated ants have one time-step of memory, used to avoid going back and  
192 forth along the same edge. As is characteristic of many species of ants [53, 54, 55], simulated ants  
193 have no unique identifiers and can use only local information.

194  
195 **Parameters.** Our algorithm uses three biological parameters:  $q_{\text{add}}$ ,  $q_{\text{decay}}$ , and  $q_{\text{explore}}$ .

The first parameter ( $q_{\text{add}}$ ) determines how much pheromone is added when an ant traverses an

edge. After each time step, each edge  $(v_1, v_2)$  traversed increases its edge weight as:

$$w(v_1, v_2) \leftarrow w(v_1, v_2) + q_{\text{add}}. \quad (1)$$

196 Without loss of generality, we fix  $q_{\text{add}} = 1$ , representing a unit of pheromone that an ant deposits  
197 on each edge traversed.

The second parameter ( $q_{\text{decay}}$ ) specifies how much pheromone evaporates on each edge in each time step due to natural decay. We model pheromone decay as an exponential decrease in edge weight [56, 57]; thus  $q_{\text{decay}} \in (0, 1)$ , and at each time step, for each edge  $(v_1, v_2)$ , its weight is updated as:

$$w(v_1, v_2) \leftarrow w(v_1, v_2) \times (1 - q_{\text{decay}}). \quad (2)$$

198 Larger values of  $q_{\text{decay}}$  correspond to more rapid decay of pheromone on the edge.

199 The third parameter ( $q_{\text{explore}}$ ) specifies the probability that an ant takes an “explore step”. The  
200 definition of an “explore step” is algorithm-specific (see below), but intuitively, it involves choosing  
201 an edge with relatively less or no pheromone. Such deviation is clearly required by any network  
202 repair algorithm, since after the routing backbone is ruptured, edges not part of the existing path  
203 must be traversed to repair the break. Field observations show that even in the absence of a break,  
204 turtle ants explore edges off the main trail. This allows them to discover new food sources and  
205 incorporate them into the trail network [12].

206

207 **Performance metrics.** After  $T$  time steps, we evaluate the outcome of the algorithm using the  
208 following measures (averaged over 50 repeat simulations):

- 209 1. Success rate: The probability that the simulated ants succeeded in forming a new path from  
210  $u$  to  $v$  that does not use the broken edge. In this new path, ants are not required to traverse  
211 edges of relatively low weight (Methods). Higher values are better; for example, a success  
212 rate of 70% means that in 70% of the simulations, the ants successfully formed an alternative  
213 path.
- 214 2. Path entropy: An information-theoretic measure of how well the ants converge to a single  
215 consensus path, rather than creating multiple, potentially overlapping,  $u \rightarrow v$  paths with  
216 pheromone. Lower values are better, indicating that subsequent ants using the same algorithm  
217 on the resulting network will all follow a common path, rather than dispersing along many  
218 different paths. This measure is computed only in the simulations in which an alternative  
219 path was successfully found. Field observations show that turtle ants consistently converge  
220 to a consensus path, and loops in the network are often pruned away over time [12]. This  
221 reduces the numbers of lost ants and the numbers of ants traveling in circles.
- 222 3. Path length: The length of the new path. Although turtle ants do not always find the globally  
223 shortest path [12], we include this measure because it is commonly used to evaluate routing  
224 algorithms. Lower values are better, indicating shorter paths. This measure is computed only  
225 in the simulations in which an alternative path was successfully found.

226 **A model of computation for individual ants.** We assume that all ants are identical and have  
227 the following computational abilities:

228 • Each ant can avoid the node it immediately previously visited. It cannot, however, remember  
229 its entire path from the nest up to its current point. The ant may also keep track of a  
230 binary state variable that determines whether it is coming back from a dead end and should  
231 discontinue laying pheromone.

232 • In field observations, ants appear to pause at nodes and inspect more than one edge before  
233 choosing an edge to take [12]. Thus, each ant can access all adjacent edge weights to decide  
234 which node to visit next. To choose its next edge, we allow ants to perform any Turing-  
235 computable computation, although we show that a simple, albeit non-linear, function will  
236 suffice.

237 See Methods for full technical details of the model and performance metrics.

### 238 Candidate distributed algorithms

239 Below we introduce several biologically plausible algorithms that attempt to describe how a turtle  
240 ant at a node  $s$  chooses which edge to traverse next among possible neighboring edges  $t_1, t_2, \dots, t_n$ .  
241 These algorithms build upon previous linear and non-linear models used to analyze ant trail for-  
242 mation in other species, such as Argentine ants [58, 59, 60] and pharaoh ants [61]. Let  $w(s, t_i)$  be  
243 the current weight on edge  $(s, t_i)$ , and let  $\text{uniform}()$  be a random value drawn uniformly from  $[0, 1]$ .

244  
245 In the WEIGHTED random walk (Algorithm 1), each ant chooses the next edge to traverse with  
246 probability proportional to the amount of pheromone on that edge: the more pheromone on an  
247 edge, the more likely an ant is to traverse that edge. However, with probability  $q_{\text{explore}}$ , the ant  
248 takes an edge that has zero pheromone.

---

#### Algorithm 1 WEIGHTED random walk

---

```
1:  $X \leftarrow \{t_i : w(s, t_i) > 0\}$  # Explored edges  
2:  $Y \leftarrow \{t_i : w(s, t_i) = 0\}$  # Unexplored edges  
3: if  $\text{uniform}() < q_{\text{explore}}$  then  
4:   return  $t_i \in Y$  with probability  $1/|Y|$   
5: else  
6:   return  $t_i \in X$  with probability  $w(s, t_i) / \sum_{j \in X} w(s, t_j)$   
7: end if
```

Note: The algorithm excludes the previously visited node from the sets of candidate edges. If all neighboring edges have weight 0, the ant chooses a zero-weight edge with probability 1 rather than probability  $q_{\text{explore}}$ . If none of the neighboring edges have weight 0, then the ant chooses an edge with nonzero-weight with probability 1 rather than probability  $1 - q_{\text{explore}}$ .

---

249 In the RANKEDGE random walk (Algorithm 2), with probability  $1 - q_{\text{explore}}$ , the ant chooses an  
250 edge with the highest weight (ties are broken at random). With probability  $q_{\text{explore}}$ , it bypasses  
251 the highest weighted edges and considers edges with the second highest weight. With probability  
252  $q_{\text{explore}}(1 - q_{\text{explore}})$ , it chooses an edge with the second highest weight. With probability  $q_{\text{explore}}^2$ ,  
253 it bypasses both the highest and second highest weighted edges and considers edges with the third  
254 highest weight, and so on.

255

---

**Algorithm 2** RANKEGE random walk

---

```
1:  $W \leftarrow [w_1, w_2, \dots, w_k]$  # Sorted unique edge weights, in decreasing order
2: for  $i = 1 \dots k$  do
3:    $X \leftarrow \{t : w(s, t) = W[i]\}$ 
4:   if  $\text{uniform}() < (1 - q_{\text{explore}})$  then
5:     return  $t_i \in X$  with probability  $1/|X|$ 
6:   end if
7: end for
```

**Note:** The algorithm excludes the previously visited node from the set of candidate edges. If all neighboring edges are tied for the highest weight, then a maximally-weighted edge is chosen with probability 1 rather than probability  $1 - q_{\text{explore}}$ . If an ant keeps exploring until it gets to the lowest weight, it takes one of the edges tied for the lowest weight with probability 1 rather than probability  $1 - q_{\text{explore}}$ .

---

256 Each algorithm contains additional details inspired by field observations, including a queuing sys-  
257 tem so ants traverse edges one at a time, the ability to traverse and return from an edge on an  
258 explore step in one time-step, and the ability to discontinue laying pheromone on the way back  
259 from a dead-end. See Methods for full details.

260

261 **Other algorithms:** We compared these two candidate distributed algorithms to several other non-  
262 linear algorithms (MAXEDGEA, MAXEDGEB, MAXEDGE C, MAXWEIGHTED, and DENEUBOURG),  
263 as described in the Supplement. We also compared to a null model, called the UNWEIGHTED ran-  
264 dom walk. The null model uses no parameters; instead, the ants ignore edge weights and choose  
265 amongst candidate edges with equal probability.

266

267 **Summary of conclusions.** Overall, we find that non-linear models perform the best at simulta-  
268 neously explaining field observations and providing a mechanism by which turtle ants could solve  
269 the network repair problem. While the linear (Weighted) algorithm does perform well at explaining  
270 some aspects of field observations, and it repairs breaks with high probability, it also produces a  
271 very high path entropy, with poor convergence to a consensus path. This departs strongly from  
272 field observations [12] that show that when repairing broken paths, the ants quickly converge to a  
273 single path.

274 In particular, we find that: (A) RANKEGE outperforms all other non-linear algorithms, except  
275 for MAXEDGEA, in the likelihood of explaining observed edge choices by turtle ants (Table 1). The  
276 log-likelihoods of RANKEGE and MAXEDGEA were nearly identical. (B) When parameterized  
277 by field data, RANKEGE outperforms all other non-linear algorithms in success rate (Table 2);  
278 and (C) RANKEGE is equivalent to all other non-linear algorithms in path entropy (Table 3).  
279 Compared to the linear WEIGHTED algorithm, RANKEGE has a lower likelihood of explaining the  
280 observed edge choices and a lower success rate. However, RANKEGE performs much better in  
281 path entropy, path length, and maintaining the trail in the absence of a break. We emphasize that  
282 the strong success rate of WEIGHTED is because pheromone is left essentially on every edge in the  
283 graph. This guarantees high success but very poor convergence to a single path. Field experiments  
284 show that turtle ants converge strongly to a single path.



## 285 Q1. Field observations to determine the best algorithm and parameter values

286 We first determined what parameter values best allow each algorithm to match the data from field  
287 observations. We then used these parameter values to test algorithm performance for the network  
288 repair problem.

289 The performance of each candidate algorithm is sensitive to the values chosen for the two free  
290 parameters,  $q_{\text{explore}}$  and  $q_{\text{decay}}$  (as previously mentioned, we set  $q_{\text{add}} = 1$ ). For example, with low  
291 values of  $q_{\text{explore}}$ , the ants may take a long time to explore enough new edges to find an alternative  
292 path; on the other hand, for high values of  $q_{\text{explore}}$ , the ants will scatter throughout the network and  
293 may not converge to a single path. Similarly, for high values of  $q_{\text{decay}}$  (pheromone decays rapidly),  
294 it may be difficult to build and reinforce a single path; for low values of  $q_{\text{decay}}$ , it may be hard for  
295 the colony to eliminate unnecessary edges and commit to one path. These two parameters also  
296 affect each other; for example, the higher the decay rate, the fewer edges with pheromone, and thus  
297 the more possible edges to explore.

298 We used data from observations made in the field to evaluate the match between the choices  
299 of edges made by turtle ants and the choices predicted by a candidate algorithm (with parameters  
300  $q_{\text{explore}}, q_{\text{decay}}$ ). Observations were made at La Estacion Biologica de Chamela in Jalisco, Mex-  
301 ico [6, 12]. Ants were observed traversing a junction (node) along a foraging trail. We recorded  
302 the time at which an ant moved to or from that junction node, and the edge it chose to traverse  
303 (Figure 2A–B). Observations were made of six different colonies, with an average of 2.16 junctions  
304 per colony, over three days in June 2015 and one day in June 2016. We observed 13 different  
305 junctions for time periods ranging from 7 to 24 minutes (mean of 12.3 minutes per observation at  
306 a given colony on one day), for a total of 773 edge choices made by turtle ants.

307  
308 *Maximum likelihood estimation.* We determined which algorithm and parameter values best ex-  
309 plained the observed edge choices made by turtle ants using maximum likelihood estimation (MLE).  
310 The data were used to determine the likelihood that a given algorithm, with a given pair of param-  
311 eter values, would have produced the observed set of edge choices. Figure 2A–B shows an example  
312 likelihood calculation, and Figure 2C–D illustrates the results of the MLE for each algorithm over  
313 all pairs of parameter values.

314 Overall, for RANKEGE, the maximum likelihood parameter values that best explained the  
315 observed turtle ant behavior were:  $q_{\text{explore}} = 0.20$ , and  $q_{\text{decay}} = 0.02$  (Table 1). For WEIGHTED,  
316 the maximum likelihood parameter values were  $q_{\text{explore}} = 0.05$  and  $q_{\text{decay}} = 0.01$ . Both candidate  
317 algorithms were more likely to explain the data than the null model (Table 1).

318  
319 *Consistency of the maximum likelihood estimation across colonies and days.* The maximum likeli-  
320 hood parameter values were similar across colonies and days for the 13 junctions (Figure S2). This  
321 suggests that across six colonies, there are similar chemical properties in the pheromone (related to  
322  $q_{\text{decay}}$ ), and that a similar search strategy is used for choosing which edge to traverse next (related  
323 to  $q_{\text{explore}}$ ).

## 324 Q2. Algorithm performance on synthetic and real-world planar networks

325 Our goal here is to test how well each algorithm solves the network repair problem on simulated  
326 and real-world networks. We were particularly interested in how well each algorithm performed  
327 when its parameters were set to the maximum likelihood values derived from observations of turtle

328 ants. Our main result is that the maximum likelihood parameters for the RANKEDGE performed  
329 well in simulations for network repair across six networks (Figure 3; the black rectangle in both  
330 panels shows that the parameter values that best explain the turtle ants' behavior also perform  
331 best for solving the network repair problem.) The latter result is substantiated below.

332

333 **Simulation setup.** For all simulations, we ran each algorithm for  $T = 1000$  steps using  $N = 100$   
334 ants, and repeated each simulation 50 times. To initialize each simulation, we placed each of the  
335  $N$  ants at a random node in the original path. This means that at the start of the simulation there  
336 were likely ants at nodes on both sides of the rupture in the path. No ants were placed at nodes  
337 not part of the original path. Each ant was randomly assigned to walk in search of one of the two  
338 nests. All edges that were part of the initial path were initialized with 10 units of pheromone. All  
339 other edges were initialized to 0 units of pheromone. When an ant reached its destination nest,  
340 it attempted to return to the other nest, and repeated this, going back and forth between nests,  
341 for  $T$  time-steps. The ants walk synchronously for  $T$  time-steps; this is a common assumption in  
342 distributed computing problems.

343

344 Our first performance metric, called the *success rate*, measures how well the ants succeed in finding  
345 an alternative path to repair the break. We simulated breaks under six planar network structures,  
346 which have an increasingly complex topology with varying numbers of possible paths. In each  
347 evaluation below (Figure 4), we show three panels: the initial network with a break, the final  
348 network at the end of the simulation, which is generated using the MLE parameter values, and a  
349 heatmap showing the success rate for pairs of parameter values ( $q_{\text{explore}}, q_{\text{decay}}$ ) close to the MLE  
350 range. In each synthetic network, a only single link is broken (shown as the 'X' mark in Figure 4);  
351 in the Supplement, we describe cases where multiple links are broken.

352 We analyzed all algorithms but show results only for RANKEDGE in the main text because  
353 WEIGHTED rarely converged onto a single path, thus it did not satisfy our second performance  
354 metric. It also did not maintain trails in the absence of a break. These results are described in  
355 detail below. Also, see Table 2 and Supplement for analysis of the additional non-linear algorithms.

356

357 *Minimal graph (Figure 4A).* Here we find that RANKEDGE can solve a basic repair problem in a  
358 minimal working example, in which the break causes the existing path to lead to a dead end that  
359 should be avoided in favor of a single alternative path to the nest. To favor the alternative path,  
360 the simulated ants must largely eliminate the pheromone on the edge leading to the dead end, a  
361 process which we call 'pruning'. To favor the alternative path instead of the existing path, the ants  
362 should put more pheromone on the edge leading upwards to the alternative route, even though this  
363 edge initially had no pheromone.

364 We find that the RANKEDGE algorithm succeeds in this task 100% of the time, as long as the  
365 ants do not leave pheromone on the way back returning from the dead-end (Methods and Q4).

366

367 *Simple graph (Figure 4B).* Here we increased the complexity of the graph to offer two alternative  
368 paths, instead of one in the Minimal graph. We found that RANKEDGE not only prunes the dead-  
369 end, but it can find and commit to one of the two alternatives with a 98% success rate.

370

371 *Medium graph (Figure 4C).* Here we further increased the complexity of the Minimal graph to offer  
372 six alternative paths and found that RANKEDGE not only prunes the dead-end, but can find and

373 commit to one of the six alternatives with a 84% success rate.

374

375 *Full grid (Figure 4D)*. The Full grid presents a different computational challenge: there is no dead-  
376 end to prune and the shortest alternative path requires only 3 additional edges. However, the total  
377 number of possible new paths is extremely large, which makes it difficult to find and commit to  
378 a single path. The Full grid is also a standard benchmark used in the ANTS problem (Related  
379 work), in which ants search the integer plane [38, 39, 40].

380 We found that the highest success rate (70%) occurred for low values of  $q_{\text{decay}}$ , which closely  
381 matches the observed best decay value estimated using maximum likelihood. This highlights an  
382 inherent trade-off in the turtle ant algorithm. Low decay rates help preserve the initial path and  
383 bias the turtle ants toward finding an alternative route that re-uses as much of the previous path  
384 as possible; that is, with low decay rates, repair starts as close to the break as possible. However,  
385 low decay rates also limit the capacity to search for other paths that may be shorter even though  
386 they re-use less of the previous path. An alternative would be to use higher values of  $q_{\text{explore}}$  to  
387 search for other paths that do not re-use the initial path, but this would make it more difficult for  
388 the ants to converge to a single new path.

389

390 *Spanning grid (Figure 4E)*. In contrast to the Full grid, the Spanning grid is sparser and requires  
391 that the ants go back at least one node from the break to find an alternative path.

392 We found that the maximum likelihood parameters produced a moderate success rate (54%).  
393 As above, the highest success rate occurred for low values of  $q_{\text{decay}}$  and moderate values of  $q_{\text{explore}}$ .  
394 These values achieve a good trade-off between searching sufficiently far from the break to find an  
395 alternative path, and largely preserving the previous path. The performance on the Spanning grid  
396 demonstrates that the algorithm is flexible enough to search locally around a break point for new  
397 paths, while still maintaining most of the old path.

398 The results from the Full grid and the Spanning grid together suggest that the algorithm per-  
399 forms best when it preserves as much of the previous path as possible, even if it can not re-use  
400 all of the original path. This is consistent with field observations that showed that turtle ants  
401 sought alternative paths in a “greedy” manner, by going back up to 1 or 2 nodes from the break  
402 point, even though going back more nodes may have resulted in a path with fewer nodes overall [12].

403

404 *European road transportation network (Figure 5)*. To demonstrate the utility of this algorithm in a  
405 real-world scenario, we applied the RANKEGE algorithm to repair networks in a human-designed  
406 transport network. We downloaded the network depicting the major roads (edges) connecting in-  
407 tersections (nodes) in the international E-Road in Europe [62] (Methods). We removed an edge  
408 from an existing path between two nodes and ran the RANKEGE algorithm to repair the simulated  
409 closure. The RANKEGE algorithm achieved a success rate of 70%, indicating that the turtle ant  
410 algorithm can also repair breaks in real-world topologies. This shows how distributed solutions may  
411 be useful for new application domains, such as for swarm robotics or molecular robots [63, 64, 65, 66]  
412 in remote environments, when centralized or global positioning systems may not be as effective.

413

414 We also compared the algorithms on Erdos-Renyi random networks and small-world networks and  
415 found similar gains in performance for RANKEGE (Supplement).

416

417 **Q2a. Converging onto a single consensus path (Table 3)**. Our second performance metric,

418 called *path entropy*, measures how well foragers commit to a single alternative path.

419 We find that the RANKEDGE algorithm consistently achieves a path entropy near 0, indicating  
420 that on the final network all ants follow the same path when not taking explore steps (Table 3).  
421 This is particularly challenging for the Full and Spanning grids because both contain a large num-  
422 ber of possible paths, and thus a large possible path entropy if the simulated ants exploit many  
423 paths. Thus, when the algorithm succeeds in repairing the path, RANKEDGE satisfies our second  
424 performance criterion.

425 More generally, one advantage of non-linear algorithms such as RANKEDGE is that all simu-  
426 lated ants, by simply following the maximal edge (the adjacent edge with the highest pheromone),  
427 can travel from one nest to the other using the same path, thereby achieving a path entropy of 0.  
428 On the other hand, linear algorithms such as WEIGHTED do succeed in finding a path; however,  
429 WEIGHTED is unable to commit to only one path, and thus has very high path entropy (Figure 6).

430  
431 **Q2b. Finding short paths (Table 4).** Our third performance metric measures the path length  
432 of the final trail network. We found that RANKEDGE consistently finds paths of lengths that are  
433 close to, though slightly larger than, the globally shortest path lengths. For every network, we  
434 compared the average path lengths of RANKEDGE versus every other algorithm using Welch’s un-  
435 paired T-test. RANKEDGE finds significantly shorter paths than WEIGHTED and UNWEIGHTED on  
436 the Full grid, Spanning grid, and European roads ( $p < 0.05$ ); RankEdge is not significantly differ-  
437 ent from the other non-linear algorithms (Table 4). The improved performance over UNWEIGHTED  
438 demonstrates the value of using pheromone to solve the network repair problem collectively, instead  
439 of using independent search.

440  
441 **Q2c. The power of bi-directional search (Figure S3).** We find that a bi-directional search,  
442 in which simulated ants attempt to create an alternative path concurrently from both sides of the  
443 break, allows the algorithm to perform significantly better than a uni-directional search using ants  
444 from only one side of the break. We tested this on the Full grid, and found that for the MLE  
445 parameter values for RANKEDGE, the success rate was on average 70% for a bi-directional search  
446 versus 14% for uni-directional search.

447 One might predict that uni-directional search would perform as well as the bi-directional search,  
448 while simply taking longer. However, we found this not to be true: using a bi-directional search  
449 means that once ants from side A of the break reach side B of the break, the rest of their search is  
450 directed by the pheromone trail laid by ants that started on side B. In the uni-directional search,  
451 even if ants from side A reach side B, they must still find a path from scratch connecting the dead  
452 end on side B to the nest on side B. Although uni-directional search has rarely been observed to  
453 occur in turtle ant networks, we tested it here to compare it with bi-directional search, which is  
454 often used to improve the performance of search algorithms.

455  
456 **Q2d. The power of avoiding backtracking (Figure S4).** We find that providing simulated  
457 ants the ability to avoid backtracking, i.e., visiting the same node visited in the previous time-step  
458 (Methods) allows for a significant improvement in algorithm performance. In contrast, ants that  
459 are not given this ability could keep going back and forth along the same edge.

460 In particular, ants that used the RANKEDGE algorithm and avoided backtracking produced a  
461 success rate of 70% on the Full grid, compared to 0% when an ant was not prevented from po-  
462 tentially returning to the previous node it visited (Figure S4). Thus, providing ants with a basic

463 node-to-node sense of direction led to a significant improvement in performance.

464

465 **Q2e. Critical features for the success of a plausible algorithm.** We find that there are  
466 two important features for non-linear algorithms to perform well in simulation: (1) Simulated ants  
467 do not lay pheromone on the way back from a dead end, and (2) simulated ants queue at nodes  
468 (Methods). In the Supplement, we provide theoretical analysis for why these two components are  
469 critical for any non-linear algorithm to circumvent a dead end. Without either of these two features,  
470 the time to circumvent a dead end rises dramatically. In the Supplement, we also confirm these  
471 theoretical observations via simulation.

### 472 **Q3. Maintaining a trail in the absence of a break**

473 Here we consider whether the same algorithm used to repair a path can also keep a path intact  
474 when it is not broken. This is important because if different algorithms were used to maintain  
475 trails versus repair trails, then the turtle ants would need some signal to toggle between different  
476 methods for choosing among candidate edges, depending on the context. We found that a single  
477 algorithm, RANKEDGE, is capable of maintaining trails and responding to breaks.

478 In particular, we ran the RANKEDGE algorithm on the Spanning grid without breaking the  
479 original path and found that the trail was preserved without any modification to the algorithm or  
480 its parameters (Figure 7). In contrast, the WEIGHTED algorithm performed very poorly on this  
481 task. In particular, for RANKEDGE, the path entropy using the MLE parameter values from turtle  
482 ant data was optimal (0.00). For WEIGHTED, however, the path entropy for the MLE parameter  
483 values was much higher (5.38), indicating poor maintenance of the original path.

### 484 **Q4. Pruning as a general principle for discovering alternative paths**

485 Field observations show that turtle ants engage in pruning (Figure 8). In our simulations, we also  
486 observed that ants explored multiple alternative paths, and then most of these paths were pruned  
487 as the colony converged to a single alternative path. Further, the paths tended to become shorter  
488 over time. We quantified how many paths were pruned during the simulation using a measure  
489 called *path elimination* (Methods). We also quantified how the lengths of the remaining paths  
490 changed over time using a measure called *path length pruning* (Methods). All of the non-linear  
491 algorithms exhibit some path elimination and pruning, and thus could plausibly be used to explain  
492 the observed pruning in observed turtle ants. RANKEDGE prunes fewer paths than the other  
493 algorithms (Table 5) because RANKEDGE does not form as many initial paths as other algorithms.  
494 However, of the paths that are pruned, RANKEDGE tends to prune more nodes from the paths  
495 (Table 6).

496 For every network, we compared the average path elimination and path length pruning of  
497 RANKEDGE versus every other algorithm using Welch's unpaired T-test. For path elimination,  
498 RANKEDGE does not reduce the number of paths more than other algorithms ( $p < 0.05$ ), as we  
499 described above. However, for path length pruning, RANKEDGE reduces path lengths significantly  
500 more than all other algorithms on the Spanning grid and European roads ( $p < 0.05$ ). On the Full  
501 grid, RANKEDGE is significantly better than WEIGHTED ( $p < 0.05$ ), is not significantly different  
502 from DENEUBOURG or MAXEDGE B, and is significantly worse than MAXEDGE A, MAXEDGE C, and  
503 MAXWEIGHTED. No statistical difference is observed for the Simple and Medium graphs, likely due  
504 to their relatively simple topology. These pruning results suggest that RANKEDGE explores fewer

505 paths initially but is better at selecting the shortest of the paths it explores. RANKEDGE tends to  
506 prune fewer paths (path elimination), but of the paths it does explore, RANKEDGE converges to  
507 the shorter paths (path length reduction).

508 Field observations [12] also showed that when ruptured trails are repaired, new nodes are added  
509 to the network, and in subsequent days, some of the nodes are pruned. Such pruning of nodes  
510 also led to global pruning of paths (Figure 8). Such an “explore-exploit” strategy may help turtle  
511 ants quickly find a solution that re-connects a rupture in a trail, and may also help the colony to  
512 optimize the coherence of the trail, by minimizing the number of junctions at which ants could get  
513 lost.

514 Interestingly, using pruning-based strategies to discover the most appropriate edges or paths  
515 to keep is a common strategy used by biological systems. In particular, during the development  
516 of neural circuits in the brain, synapses are massively over-produced and then pruned-back over  
517 time [3]. This strategy is thought to help neural circuits explore possibly topologies and then  
518 converge to the most appropriate topology based on environment-dependent feedback. A similar  
519 process occurs during the development of vascular (blood flow) networks in the body [67]. Thus,  
520 pruning may be a common biological strategy of network design when multiple topologies need to  
521 be explored in a distributed manner.

522

## 523 Discussion

524 Our primary contribution is to address an engineering problem (maintaining a trail network and  
525 finding alternative paths to route around broken links in the network) using biologically feasible  
526 parameters and models motivated by how turtle ants may solve this problem in the field. Successful  
527 performance by the algorithm in simulation, using realistic parameter values, indicates that the  
528 algorithm is a plausible candidate to describe how the ants create their networks. The RANKEDGE  
529 algorithm achieved a better maximum likelihood estimate (Figures 2–3) than every other non-linear  
530 model except for MAXEDGEA. When parameterized by data from field observations, RANKEDGE  
531 was better able to find a single, short path with high probability compared to other algorithms  
532 (Tables 2,3, 4). From this, we conclude that non-linear models, in particular RANKEDGE and  
533 MAXEDGEA, represent the two best plausible models of turtle ant behavior.

534 By testing performance across six different networks, we found that the turtle ants appear to  
535 have evolved an algorithm that may not be optimal for any particular planar network but is robust  
536 to some variation in the topology. Further, non-linear algorithms exhibited pruning, which also  
537 occurred in field observations [12] (Table 6, Figure 8).

538 There are several features of our algorithm that are critical for success in repairing breaks to  
539 the routing backbone. First, to minimize path entropy it is essential to have a stronger-than-  
540 linear bias towards choosing the highest-weighted edge (RANKEDGE), rather than choosing edges  
541 proportional to their edge weight (WEIGHTED). This helps constrain the search space and leads to  
542 better convergence to a single consensus path. We emphasize that WEIGHTED has a strong success  
543 rate because pheromone is left on every edge in the graph (see e.g., Figure 6A–B). This guarantees  
544 that there exists some path with positive probability. However, WEIGHTED does not commit to a  
545 single path as effectively as an algorithm with a strong, non-linear bias toward the highest-weighted  
546 edge, such as RANKEDGE. The path entropy of WEIGHTED is high because essentially every path in  
547 the graph has high probability, and the average path length is high because the algorithm does little

548 to eliminate long paths and commit to short paths. Second, to repair breaks it is essential to use  
549 bi-directional search and avoid backtracking. Observations show that when turtle ants encounter  
550 a break, ants from both sides of the break attempt to repair the trail [12]. When ants from both  
551 sides meet, they each encounter a trail that is already strongly reinforced and guided towards the  
552 other nest. In addition, the ability to avoid backtracking allows ants to avoid going back and forth  
553 along the same edge. Third, we showed theoretically that the time needed to find an alternative  
554 path decreases significantly if turtle ants reaching a dead-end in their trail do not leave pheromone  
555 while returning back from the dead-end.

556 The RANKEDGE algorithm is parsimonious, capable of both maintaining trails and repairing  
557 breaks to trails using the same underlying logic. Observed ants encounter diverse situations analo-  
558 gous to breaks in the ongoing maintenance of trails. We find that a single algorithm can solve two  
559 diverse problems without requiring the additional complexity of a signal that distinguishes such  
560 situations from a rupture in the trail. How each path is established originally is an interesting yet  
561 distinct question. Paths are not always the shortest globally, and the physical structure of edges in  
562 the canopy appears to affect how these paths are selected.

563 The algorithm can be extended to improve performance, though this may involve sacrificing  
564 biological realism. One possible extension would allow ants to “toggle” between different parameter  
565 values or algorithms in different situations. For example, an ant could use RANKEDGE, but if it  
566 encounters a dead-end or massive crowding (determined for example by a large increase in the  
567 frequency of antennal contacts with other ants [68, 18]), then it increases its probability of exploring  
568 new edges. This would be similar to a distributed version of simulated annealing, with the value  
569 of  $q_{\text{explore}}$  corresponding to the decreasing value of the temperature parameter. A second possible  
570 extension would be to use multiple types of pheromone [69]. Ants could use negative pheromone to  
571 signal to other ants not to select a certain edge, for example, towards a dead-end. Further work is  
572 needed to measure the computational abilities of turtle ants to determine whether such extensions  
573 depart from biological realism.

574 There are some differences between our synthetic networks and the environment of the observed  
575 turtle ants. First, turtle ant trail networks in the canopy are 3D planar networks, whereas here,  
576 to begin the investigation of arboreal ant trail networks, we used 2D planar networks. The ideal  
577 test case would be a suite of synthetic networks that are isomorphic to some portion of the turtle  
578 ant canopy. In lieu of this, we describe five synthetic networks, some of which have been used by  
579 prior work, that each collectively test the ability of different algorithms to solve the network repair  
580 problem. These five networks comprise a necessary (if not exhaustive) set of test cases. Second,  
581 in the tropical forest, many edges are physically difficult to traverse, which may provide natural  
582 inhibition for selecting certain edges. Third, in the canopy, edges are not all of the same length. In  
583 future work that includes variability in edge lengths, synchronous walks will need to be modified  
584 since longer edges require more time-steps to traverse. More generally, further work is needed to  
585 determine the physical properties of junctions and branches in the canopy and how these properties  
586 influence the likelihood of traversing an edge.

587 Finally, the probabilistic RANKEDGE algorithm is biologically feasible, requiring less compu-  
588 tational complexity and assuming fewer memory requirements than many other distributed graph  
589 algorithms commonly used in computer science. This suggests that a biological algorithm evolved  
590 to deal with the constraints of the tropical forest canopy may be useful in other applications, such  
591 as in swarm robotics or molecular robots [63, 64, 65, 66]. For such applications, the best algorithm  
592 to choose depends on the requirements of the problem. We find evidence that RANKEDGE is the

593 best algorithm to achieve relatively high success rate and low path entropy. If agents do not need  
594 to adhere to a single path, then the WEIGHTED algorithm performs better, though the length of the  
595 path may be long. It appears that turtle ants use an algorithm that finds a single short path [12], as  
596 RANKEGE provides. For trivial graphs with only one alternative path, both algorithms perform  
597 similarly.

598 Overall, our work contributes to the growing intersection of distributed algorithms used by  
599 natural biological processes [70, 11].



## 600 Methods

### 601 Maximum likelihood estimation of parameter values

602 For each candidate algorithm, we varied  $q_{\text{decay}}, q_{\text{explore}} \in (0, 1)$  and evaluated the likelihood that  
603 the algorithm with a specific set of parameter values would have generated the choices made by  
604 turtle ants observed in the field. The edges traversed by the turtle ants, and times the edges were  
605 traversed, were used to compute how much pheromone had been added to and had decayed from  
606 each edge, to give the amount of pheromone on each edge at any time. In modeling pheromone  
607 decay, we treat  $q_{\text{decay}}$  as the rate of decay per second. When computing the amount of decay  
608 between two consecutive ant choices, we decay all of the edges in proportion to the number of  
609 seconds elapsed between the two choices. For each candidate algorithm, if we know all of the edge  
610 weights at a given time and the value of  $q_{\text{explore}}$ , we can compute the likelihood of a given choice.  
611 Figure 2A–B provides an example of a calculation of the likelihood of a choice for each candidate  
612 algorithm.

613 For a given combination of  $q_{\text{decay}}, q_{\text{explore}}$  we performed this likelihood computation for every  
614 observed choice in each of the 13 junctions. We updated the edge weights based on the choice and  
615 the amount of time that passed between successive choices, and then repeated this process on the  
616 next choice made by the next ant. For each junction of observations at a given node on a given  
617 day, we computed the maximum likelihood estimate (MLE) for each parameter value pair. We then  
618 added the log-likelihoods for all the 13 junctions.

619 As we formalize in the Supplement, the exponential rate of pheromone decay means that the  
620 most recent ant choices have the largest effect on the current edge weights at a junction. Pheromone  
621 added far in the past will have largely decayed and will not contribute much to the current weights.  
622 Thus, we do not need an extensive history of the choices to perform accurate modeling. It is not  
623 currently possible to measure or manipulate pheromone levels on the branches in the canopy.

### 624 Additional technical details

625 Each algorithm includes the following constraints motivated by field observations:

- 626 1. Observations suggest that turtle ants tend not to backtrack, but instead tend to keep moving  
627 along the trail in the same direction, indicating that turtle ants have at least enough sense  
628 of direction to avoid going back and forth over the same edge. Our simulations include three  
629 exceptions to this. First, because our simulations include two nests with ants going back and  
630 forth, upon reaching the nest, an ant is allowed to backtrack along the same edge it used to  
631 reach the nest. Second, if a simulated ant reaches a dead-end node that has no outgoing edges  
632 other than the previously traversed edge, it is allowed to backtrack. However, the ant does  
633 not lay pheromone on the way back until it reaches a node with two edges, excluding the edge  
634 it previously traversed. In field experiments, it is difficult to determine whether a turtle ant  
635 is laying pheromone; however, it is known that *Lasius niger* ants down-regulate pheromone  
636 deposition at dead-ends to avoid recruitment during crowding [71, 69, 69]. It is possible that  
637 turtle ants similarly down-regulate pheromone in response to dead-ends. In the Supplement,  
638 we also provide a probabilistic argument for why it is critical that ants do not lay pheromone  
639 when returning from a dead-end to repair the break. Thus, in addition to the ability to avoid  
640 backtracking, each ant requires one binary state variable that is 0 or 1 depending on whether  
641 the ant is coming back from a dead end.

- 642 2. Turtle ants queue at a node and leave in a first-in first-out manner. In other words, if more  
643 than one ant is at the same node, only one ant chooses an edge in each time-step. In the field,  
644 turtle ants walk along narrow branches, almost always one ant at a time in each direction.  
645 We find that queueing increases the success rate of the algorithm (Supplement).
- 646 3. When turtle ants take an “explore step”, they often traverse an edge for a short distance,  
647 and then return to the original node [12]. This builds a slight extension off the primary path,  
648 which can be extended by subsequent ants. In all algorithms, if a simulated ant takes an  
649 explore step, it goes across the edge and comes back in one time-step. Thus, two units of  
650 pheromone are left on the edge, and the ant is back at the node it started from. (R3-27) An  
651 explore step is defined as any choice that cannot occur unless  $q_{\text{explore}} > 0$ . For WEIGHTED,  
652 this involves taking an edge with zero weight; for RANKEGE, this involves taking an edge  
653 that does not have the highest weight. For UNWEIGHTED, there is no explore step, because  
654 ants are not inherently biased towards following any particular pheromone trail.
- 655 4. Because pheromone decays exponentially, theoretically once an ant lays pheromone on an  
656 edge, that edge’s weight will never decay to absolute 0. In practice, if the edge weight stays  
657 unchanged even after multiplying by the decay rate (due to numerical computation error,  
658 occurring at roughly  $10^{-300}$ ), then we reset the weight of that edge to absolute 0. Another  
659 possible approach would be to introduce a pheromone detection threshold parameter. If  
660 an edge had pheromone below this threshold, the ant would treat the edge as if it had no  
661 pheromone. We avoided this approach because it would introduce another parameter to  
662 optimize and compare.
- 663 5. All edges are assumed to have the same length, and it takes exactly one time step for an ant  
664 to cross an edge.

## 665 Performance metrics

666 Below we formally describe the three performance metrics used to evaluate each algorithm, after it  
667 ran for  $T$  time-steps. Intuitively, the simulated ants have successfully found a path if they can reach  
668 one nest from the other without taking any “explore steps”. We thus measure the performance  
669 of each algorithm assuming  $q_{\text{explore}} = 0$ , and consider all paths that may be taken with positive  
670 probability under this constraint. For RANKEGE and other non-linear algorithms, ants travel  
671 from one nest to the other by following the highest-weighted edges. For WEIGHTED, ants travel  
672 from one nest to the other using only edges of positive weight.

673 Formally, let the *pheromone subgraph* be the subgraph induced by the two nest nodes, all edges  
674 with a nonzero weight, and all nodes adjacent to edges with non-zero weight. Let  $G$  be a pheromone  
675 subgraph and  $P = (v_1, v_2, \dots, v_n)$  be a path in  $G$ , with nests  $v_1$  and  $v_n$ . For a node  $v_{i \neq 1} \in P$ , define  
676 the candidate edges  $C_P(v_i) = \{(v_i, u) \in E(G) : u \neq v_{i-1}\}$ , i.e., the edges that the ant could take  
677 from  $v_i$  without backtracking to its previous node. Let  $v_i, v_{i+1} \in P$  be consecutive nodes in the  
678 path; we say edge  $(v_i, v_{i+1})$  is *maximal with respect to  $P$*  if  $w(v_i, v_{i+1}) = \max_{u \in C_P(v_i)} w(v_i, u)$ . The  
679 path  $P$  is a *maximal path* if for every pair of consecutive nodes  $v_i, v_{i+1} \in P$ , the edge  $(v_i, v_{i+1})$  is  
680 maximal with respect to  $P$ . An ant taking a maximal path always takes an edge with the highest  
681 weight; thus, a maximal path allows an ant using one of the non-linear algorithms to commute  
682 between two nests with positive probability even if  $q_{\text{explore}} = 0$ .

683 Next, define a *pheromone path* to be a path in which all edges have positive weight. Such a  
684 path allows an ant following the WEIGHTED algorithm to commute between two nests with positive  
685 probability even when  $q_{\text{explore}} = 0$ .

686 For a given algorithm, define a *solution path* to be a path that can be traversed with positive  
687 probability under that algorithm when  $q_{\text{explore}} = 0$ . For all the non-linear algorithms discussed  
688 here, solution paths are equivalent to maximal paths. For the WEIGHTED algorithm, a solution  
689 path is equivalent to a pheromone path.

690 Let  $\hat{p} = (p_1, p_2, \dots)$ ,  $\sum_i p_i = 1$  be a probability distribution. Define the *entropy* of the distri-  
691 bution to be:  $S(\hat{p}) = -\sum_i p_i \log(p_i)$ .

692 At the end of the simulation, we evaluate the pheromone subgraph of each algorithm by com-  
693 puting the following measures:

- 694 • **Success rate (higher is better):** The probability that the ants form a solution path. This  
695 is defined empirically by computing the percentage of the  $N$  simulations where a solution  
696 path is formed in the final graph.
- 697 • **Path entropy (lower is better):** An information-theoretic measure of how well the ants  
698 converge onto a single solution path.
  - 699 – Let  $M_1, M_2, \dots, M_n$  be the set of all  $n$  solution paths in the final graph.
  - 700 – Let  $p_1, p_2, \dots, p_n$  be the probabilities of taking each solution path with  $q_{\text{explore}} = 0$ . The  
701 probabilities  $\hat{p} = (p_1, p_2, \dots, p_n)$  form a probability distribution.
  - 702 – The path entropy is then:  $S(\hat{p})$ .
- 703 • **Average path length (lower is better):** The average length of the solution paths in the  
704 final graph. Path length is defined to be the number of nodes in a path.

705 To compute the pruning metrics, we first define a *chosen path* as the sequence of nodes  $v_1, v_2, \dots, v_n$ ,  
706 after removing cycles, that an ant takes to successfully walk from one nest to another. Figure S1  
707 illustrates why removing cycles is necessary when comparing chosen paths.

708 Over the course of the simulation, we track all chosen paths for all ants that successfully walk  
709 from one nest to the other. This includes the number of times each path was chosen — and thus  
710 the distribution over the chosen paths — and the lengths of these paths.

- 711 • **Path elimination:** An information-theoretic measure of the degree to which paths from one  
712 nest to the other are eliminated over time.
  - 713 – Let  $S_t = S(\hat{p}_t)$  be the entropy over the distribution of chosen paths  $\hat{p}$  that have been  
714 completed at or before time  $t$ .
  - 715 – Let  $S_{\text{max}} = \max_{1 \leq t \leq T} S_t$  be the maximum chosen-path entropy over the entire simulation.
  - 716 – The path elimination is then the maximum entropy minus the entropy at the end of the  
717 simulation:  $S_{\text{max}} - S_T$ .
- 718 • **Path length pruning:** A measure of the degree to which ants reduce the lengths of the  
719 paths they take over time.

- 720 – Suppose at time  $t$  the ants have taken chosen paths  $p_1, p_2, \dots, p_n$  with frequencies  
721  $c_1, c_2, \dots, c_n$ . Let  $l(p_i)$  be the length of path  $p_i$ . We define the *weighted-mean cho-*  
722 *sen path length* at time  $t$  to be:  $L_t = \frac{\sum_i c_i \cdot l(p_i)}{\sum_i c_i}$ .
- 723 – Let  $L_{max} = \max_{1 \leq t \leq T} L_t$  be the maximum weighted mean chosen path length over the entire  
724 simulation.
- 725 – The path length pruning is then:  $L_{max} - L_T$ .

726 **Robustness across network topologies.** To determine which parameter values performed well  
727 across all the planar topologies tested, we defined the *robustness* of a set of parameter values  
728 ( $q_{\text{explore}}, q_{\text{decay}}$ ) to be the geometric mean of the success rates for those parameter values on all six  
729 networks. We use the geometric mean because it penalizes parameter values that perform poorly  
730 on any one particular graph; for a set of parameter values to have a high geometric mean, it must  
731 perform well on every graph. When computing robustness, we weight the success rates over all  
732 networks equally. This is done for two reasons: first, this highlights algorithms that perform well  
733 under a variety of distinct but equal conditions; and second, we do not currently have complete  
734 data on which topologies are more or less likely to occur in the canopy, and thus it is not clear how  
735 weighting factors should be selected.

736

737 **Application to the European road network.** We sampled a portion of the European road  
738 network. This sample contained the same number of nodes as the Full grid ( $11 \times 11 = 121$  nodes).  
739 Sampling was done by selecting a random node and performing a breadth-first search until 121  
740 nodes were visited. The network contained these 121 nodes and all the edges adjacent to these  
741 nodes. We then randomly selected two nodes and removed a randomly-chosen edge in the shortest  
742 path between those nodes. If removing this edge disconnected the two nodes, we discarded the pair  
743 of nodes and picked a new randomly chosen pair of nodes. We then applied our algorithm to repair  
744 the trail.

| Algorithm   | $q_{\text{explore}}$ | $q_{\text{decay}}$ | log-likelihood |
|-------------|----------------------|--------------------|----------------|
| UNWEIGHTED  | N/A                  | N/A                | -744.25        |
| WEIGHTED    | $0.05 \pm 0.06$      | $0.01 \pm 0.10$    | -345.05        |
| RANKEDGE    | $0.20 \pm 0.04$      | $0.02 \pm 0.08$    | -405.42        |
| MAXEDGEA    | $0.20 \pm 0.04$      | $0.02 \pm 0.08$    | -402.63        |
| MAXEDGEB    | $0.42 \pm 0.04$      | $0.01 \pm 0.09$    | -424.61        |
| MAXEDGE C   | $0.23 \pm 0.01$      | $0.02 \pm 0.09$    | -586.87        |
| MAXWEIGHTED | $0.22 \pm 0.01$      | $0.01 \pm 0.09$    | -568.70        |
| DENEUBOURG  | $0.78 \pm 0.10$      | $0.01 \pm 0.03$    | -518.18        |

Table 1: **Maximum likelihood estimates for each algorithm.** For each algorithm, we show the values of  $q_{\text{explore}}$  and  $q_{\text{decay}}$  that maximize the likelihood of producing the observed choices made by turtle ants in the field. Standard deviation is computed across 13 junctions, each corresponding to field observations of one junction on a given day. All models are significantly more likely to explain the data than the null model (UNWEIGHTED).

| Algorithm   | Minimal | Simple | Medium | Full | Spanning Grid | Europe | Robustness |
|-------------|---------|--------|--------|------|---------------|--------|------------|
| UNWEIGHTED  | 1.00    | 1.00   | 1.00   | 1.00 | 1.00          | 1.00   | 1.00       |
| WEIGHTED    | 1.00    | 1.00   | 1.00   | 1.00 | 1.00          | 1.00   | 1.00       |
| RANKEDGE    | 1.00    | 0.98   | 0.84   | 0.70 | 0.54          | 0.70   | 0.78       |
| MAXEDGEA    | 1.00    | 0.78   | 0.74   | 0.48 | 0.36          | 0.62   | 0.63       |
| MAXEDGEB    | 0.76    | 0.60   | 0.64   | 0.64 | 0.44          | 0.70   | 0.62       |
| MAXEDGE C   | 1.00    | 1.00   | 0.84   | 0.48 | 0.44          | 0.48   | 0.66       |
| MAXWEIGHTED | 1.00    | 0.88   | 0.72   | 0.63 | 0.38          | 0.68   | 0.68       |
| DENEUBOURG  | 1.00    | 1.00   | 0.94   | 0.44 | 0.67          | 0.52   | 0.72       |

Table 2: **Success rates for each algorithm.** For each algorithm, we show the success rate on each simulated network. The last column summarizes the robustness of each method across all networks. Of the non-linear algorithms, RANKEDGE performs the best.

| Algorithm   | Minimal         | Simple          | Medium          | Full             | Spanning Grid   |
|-------------|-----------------|-----------------|-----------------|------------------|-----------------|
| UNWEIGHTED  | 0.00            | 0.69            | 1.79            | 13.75            | 7.24            |
| WEIGHTED    | $0.00 \pm 0.00$ | $0.23 \pm 0.25$ | $1.52 \pm 0.20$ | $12.38 \pm 0.22$ | $5.94 \pm 0.15$ |
| RANKEGE     | 0.00            | 0.00            | 0.00            | 0.00             | 0.00            |
| MAXEDGEA    | 0.00            | 0.00            | 0.00            | 0.00             | 0.00            |
| MAXEDGEB    | 0.00            | 0.00            | 0.00            | 0.00             | 0.00            |
| MAXEDGE C   | 0.00            | 0.00            | 0.00            | 0.00             | 0.00            |
| MAXWEIGHTED | 0.00            | 0.00            | 0.00            | 0.00             | 0.00            |
| DENEUBOURG  | 0.00            | 0.00            | 0.00            | 0.00             | 0.00            |

Table 3: **Path entropy for each algorithm.** For each algorithm, we show the path entropy on each simulated network. Lower values indicate convergence to fewer paths. All non-linear algorithms achieve the optimal path entropy. The standard deviation of the entropy for all non-linear models is 0. We do not report an interval for UNWEIGHTED because it does not depend on pheromone amount and thus has the same limiting behavior in all cases.

| Algorithm   | Minimal          | Simple           | Medium           | Full Grid        | Spanning Grid    |
|-------------|------------------|------------------|------------------|------------------|------------------|
| UNWEIGHTED  | $12.00 \pm 0.00$ | $12.90 \pm 1.00$ | $13.16 \pm 3.00$ | $26.04 \pm 6.56$ | $20.05 \pm 7.24$ |
| WEIGHTED    | $12.00 \pm 0.00$ | $12.97 \pm 0.85$ | $13.04 \pm 0.64$ | $18.36 \pm 0.18$ | $16.93 \pm 0.24$ |
| RANKEGE     | $12.00 \pm 0.00$ | $12.98 \pm 1.01$ | $10.95 \pm 1.01$ | $13.06 \pm 0.34$ | $14.56 \pm 3.97$ |
| MAXEDGEA    | $12.00 \pm 0.00$ | $12.87 \pm 1.00$ | $11.29 \pm 0.97$ | $13.17 \pm 0.56$ | $15.56 \pm 4.38$ |
| MAXEDGEB    | $12.00 \pm 0.00$ | $13.30 \pm 0.96$ | $10.77 \pm 0.99$ | $13.06 \pm 0.35$ | $15.09 \pm 4.07$ |
| MAXEDGE C   | $12.00 \pm 0.00$ | $13.02 \pm 1.01$ | $11.00 \pm 1.01$ | $13.16 \pm 0.56$ | $15.45 \pm 3.54$ |
| MAXWEIGHTED | $12.00 \pm 0.00$ | $12.87 \pm 0.99$ | $10.89 \pm 1.03$ | $13.06 \pm 0.58$ | $14.46 \pm 3.07$ |
| DENEUBOURG  | $12.00 \pm 0.00$ | $13.16 \pm 1.00$ | $11.06 \pm 1.30$ | $14.18 \pm 3.47$ | $13.94 \pm 2.51$ |
| Optimal     | 12.00            | 12.00            | 10.00            | 13.00            | 13.00            |

Table 4: **Average path length for each algorithm.** For each algorithm, we show the average path length of the final graph, measured as the number of nodes in the path. RANKEGE performed much better than the null model (UNWEIGHTED) and close to the globally shortest path length (Optimal).

| Algorithm   | Simple          | Medium          | Full Grid       | Spanning Grid     | European Roads  |
|-------------|-----------------|-----------------|-----------------|-------------------|-----------------|
| WEIGHTED    | $0.94 \pm 0.58$ | $0.48 \pm 0.32$ | $0.00 \pm 0.00$ | $0.001 \pm 0.002$ | $0.14 \pm 0.30$ |
| RANKEGE     | $0.18 \pm 0.26$ | $0.25 \pm 0.29$ | $0.14 \pm 0.20$ | $0.15 \pm 0.18$   | $0.10 \pm 0.16$ |
| MAXEDGEA    | $0.54 \pm 0.84$ | $0.69 \pm 1.14$ | $0.26 \pm 0.49$ | $0.78 \pm 1.37$   | $0.01 \pm 0.01$ |
| MAXEDGEB    | $0.25 \pm 0.61$ | $0.66 \pm 1.06$ | $0.29 \pm 0.56$ | $0.84 \pm 1.73$   | $1.18 \pm 2.44$ |
| MAXEDGE C   | $0.40 \pm 0.78$ | $1.29 \pm 1.40$ | $0.48 \pm 0.92$ | $1.03 \pm 1.58$   | $0.04 \pm 0.07$ |
| MAXWEIGHTED | $0.44 \pm 0.78$ | $1.04 \pm 1.23$ | $0.68 \pm 1.43$ | $1.36 \pm 2.93$   | $0.38 \pm 0.46$ |
| DENEUBOURG  | $0.43 \pm 0.56$ | $1.60 \pm 0.96$ | $0.55 \pm 1.45$ | $1.40 \pm 2.36$   | $1.47 \pm 2.95$ |

Table 5: **Path elimination:** For each algorithm, we show the average reduction in entropy over chosen paths over time (Methods). We omit the Minimal graph, because there is only one possible path from one nest to the other, and thus no path elimination is possible.

| Algorithm   | Simple          | Medium          | Full Grid         | Spanning Grid     | European Roads  |
|-------------|-----------------|-----------------|-------------------|-------------------|-----------------|
| WEIGHTED    | $0.94 \pm 0.58$ | $0.48 \pm 0.32$ | $0.00 \pm 0.00$   | $0.001 \pm 0.002$ | $0.14 \pm 0.30$ |
| RANKEDGE    | $0.30 \pm 0.58$ | $0.39 \pm 0.58$ | $0.04 \pm 0.14$   | $0.97 \pm 2.59$   | $0.35 \pm 0.50$ |
| MAXEDGEA    | $0.30 \pm 0.27$ | $0.28 \pm 0.30$ | $0.11 \pm 0.17$   | $0.15 \pm 0.20$   | $0.05 \pm 0.10$ |
| MAXEDGEB    | $0.14 \pm 0.23$ | $0.15 \pm 0.23$ | $0.06 \pm 0.10$   | $0.11 \pm 0.16$   | $0.08 \pm 0.14$ |
| MAXEDGE C   | $0.31 \pm 0.29$ | $0.50 \pm 0.36$ | $0.12 \pm 0.17$   | $0.13 \pm 0.21$   | $0.08 \pm 0.13$ |
| MAXWEIGHTED | $0.29 \pm 0.30$ | $0.39 \pm 0.33$ | $0.15 \pm 0.23$   | $0.19 \pm 0.24$   | $0.17 \pm 0.23$ |
| DENEUBOURG  | $0.46 \pm 0.17$ | $0.42 \pm 0.28$ | $0.001 \pm 0.003$ | $0.04 \pm 0.09$   | $0.02 \pm 0.09$ |

Table 6: **Path length pruning:** For each algorithm we show the average reduction in lengths of chosen paths over time (Methods) observed. We omit the Minimal graph, because there is only one possible path from one nest to the other, and thus no pruning is possible.

## 745 Figure Legends

Figure 1: **Turtle ant habitat and trail network.** A) The photograph shows the highly tangled forest canopy in which turtle ants forage. B) Experiments were performed in which an edge in the path was cut, to observe how the ants respond and repair the break [12]. C) Modeling the trail network as a graph, with junctions as nodes and connecting branches and twigs as edges. The diagram on the right from [12] shows a detailed depiction of a large portion of the trail network. Each days path is shown in a different color (see legend), and additional repair paths are shown in a distinct color. Solid lines connect two nodes that are on the same plant (e.g. node 36 and node A are on the same plant). Dashed lines connect two nodes that are on a different plant (e.g. nodes B and C are on different plants).

Figure 2: **Maximum likelihood computation.** A–B) Example node junction and edge choices for turtle ants. All ants arrive at node 1 from a different node that is not shown. In the example, we assume pheromone has been deposited at previous time-points, and we now compute the likelihood of the next ant choice. Under the RANKEDGE algorithm, the likelihood of choosing edges  $1 \rightarrow 3$  or  $1 \rightarrow 2$  is  $(1 - q_{\text{explore}})(1/2)$ ; the likelihood of edge  $1 \rightarrow 4$  is  $q_{\text{explore}}(1 - q_{\text{explore}})$ ; and the likelihood of  $1 \rightarrow 5$  is  $q_{\text{explore}}^2$ . Under the WEIGHTED algorithm, the likelihood of choosing edge  $1 \rightarrow 5$  is  $q_{\text{explore}}$ ; the likelihood of edge  $1 \rightarrow 4$  is  $(1 - q_{\text{explore}})(1/(1 + 2 + 2))$ ; and the likelihood of edges  $1 \rightarrow 2$  or  $1 \rightarrow 3$  is  $(1 - q_{\text{explore}})(2/(1 + 2 + 2))$ . Under the UNWEIGHTED algorithm, the edge weights are disregarded, and the likelihood of taking any one of the four edges is  $(1/4)$ . C–D) For each combination of  $q_{\text{explore}}$  ( $x$ -axis) and  $q_{\text{decay}}$  ( $y$ -axis) values, we determined the pair’s likelihood of producing the choices observed in turtle ants. Each heatmap shows the likelihood for each algorithm with a zoom-in below around the highest likelihood region. The optimal parameter values for each algorithm, depicted in white, are shown in Table 1.

Figure 3: **The maximum likelihood parameters closely match the best simulation parameters:** A) The color of each square in the heatmap corresponds to the robustness (Methods) of the success rates for the RANKEDGE algorithm for each combination of  $q_{\text{explore}}$  ( $x$ -axis) and  $q_{\text{decay}}$  ( $y$ -axis) values. Results are aggregated over the six simulated and real-world networks presented in Figures 4 and 5. B) The maximum likelihood parameter estimates for RANKEDGE from observations of turtle ants. The black rectangle in both panels shows that the parameter values that best explain the turtle ants’ behavior also perform best for solving the network repair problem.



Figure 4: **Success rates for each network.** A–E) For each network we show the initial graph (left), an example of the final graph after running the RANKEGE algorithm using the maximum likelihood parameters (middle), and the algorithm’s success rate for each parameter combination (right). In each panel, black dots indicate nodes in the network, and solid lines indicate edges that may be traversed. If two adjacent nodes are not connected by an edge, there is a space between them. In the initial graphs, the ‘X’ marks the edge that is broken. The  $x$ -axis of the heatmap (right column) shows  $q_{\text{explore}}$ , and the  $y$ -axis shows  $q_{\text{decay}}$  under the range close to the MLE parameters. Darker shades of red are indicate success rates closer to 1, and thus are better.

Figure 5: **Repairing road closures in the Europe road graph.** Analysis of how well the turtle ant algorithm translates to repair simulated breaks in a real-world transport network. A) An example of a path in the European E-road network connecting Munich to Berlin, Germany. The roads and junctions form a graph. On the left, the black ‘X’ shows a road that has been broken or closed along the path. On the right, we show an alternative path that avoids the broken road. B) The success rate of the turtle ant algorithm (RANKEGE) applied to this network. Map data: Google, DigitalGlobe.

Figure 6: **Poor path entropy for Weighted.** The initial (left) and final (right) networks for the (A) Full grid and (B) Spanning grid. In both cases, the MLE parameter values ( $q_{\text{explore}} = 0.05, q_{\text{decay}} = 0.01$ ) for WEIGHTED did not find a low path entropy solution.

Figure 7: **Analysis in the absence of a break.** A) Initial Spanning grid, with no break. B) The final network produced using WEIGHTED, which does not find a low entropy solution. C) The final graph using RANKEGE, which finds a low path entropy solution.

Figure 8: **Turtle ants prune paths.** The diagram from [12] shows the results of an experiment in which an edge was cut. Left: The initial trail is shown in grey. The edge connecting nodes 5 and 6 was cut. After 75 minutes, the turtle ants explored several new paths (red). Center: Five hours after the cut, some of the red paths were pruned (transparent grey). Ants traveling down from node 7 took one trail, consisting of nodes 6, 15, 16, 17, 18, 4, and 3, because they could not use 12 in this direction. Ants traveling in the other direction took another trail, consisting of nodes 3, 4, 5, 12, 13, and 14, or the trail consisting of 11, 13, and 14. Right: The next day, there was additional pruning. Because node 12 could now be used in both directions, ants traveled both ways on the indicated trail.

## 746 **Acknowledgments**

747 The authors thank Jason Schweinsberg for guiding us in the theoretical proof. We are grateful to  
748 Illia Ziamtsov, Javier How, Benjamin Cosman, Ailie Fraser, Will Hamilton, Sam Crow, Alex Lang,  
749 and the anonymous reviewers for helpful comments on the manuscript.

## 750 **Source code and datasets**

751 All source code for the algorithm and all datasets for the ant choices are available at our Github  
752 repository: <http://github.com/arjunc12/Ants>.

## 753 References

- 754 [1] N. A. Lynch. *Distributed Algorithms*. Morgan Kaufmann Publishers Inc., San Francisco, CA, USA,  
755 1996.
- 756 [2] A. Tero, S. Takagi, T. Saigusa, K. Ito, D. P. Bebber, M. D. Fricker, K. Yumiki, R. Kobayashi, and  
757 T. Nakagaki. Rules for biologically inspired adaptive network design. *Science*, 327(5964):439–442, Jan  
758 2010.
- 759 [3] Saket Navlakha, Alison L. Barth, and Ziv Bar-Joseph. Plos computational biology: Decreasing-rate  
760 pruning optimizes the construction of efficient and robust distributed networks. *PLoS ONE*, July 2015.  
761 (Accessed on 07/13/2016).
- 762 [4] T. Latty, K. Ramsch, K. Ito, T. Nakagaki, D. J. Sumpter, M. Middendorf, and M. Beekman. Structure  
763 and formation of ant transportation networks. *J R Soc Interface*, 8(62):1298–1306, Sep 2011.
- 764 [5] Anthony Brabazon, Michael O’Neill, and Sen McGarraghy. *Natural Computing Algorithms (Natural  
765 Computing Series)*. Springer, 2015.
- 766 [6] D. M. Gordon. The dynamics of foraging trails in the tropical arboreal ant *Cephalotes goniodontus*.  
767 *PLoS ONE*, 7(11):e50472, 2012.
- 768 [7] A. Bottinelli, E. van Wilgenburg, D. J. Sumpter, and T. Latty. Local cost minimization in ant transport  
769 networks: from small-scale data to large-scale trade-offs. *J R Soc Interface*, 12(112), Nov 2015.
- 770 [8] Michele C Lanan, Anna Dornhaus, and Judith L Bronstein. The function of polydomy: the ant cre-  
771 matogaster torosa preferentially forms new nests near food sources and fortifies outstations. *Behavioral  
772 Ecology and Sociobiology*, 65(5):959–968, 2011.
- 773 [9] Mark Newman. *Networks: An Introduction*. Oxford University Press, Inc., New York, NY, USA, 2010.
- 774 [10] Thomas H. Cormen, Charles Eric Leiserson, Ronald L Rivest, and Clifford Stein. *Introduction to  
775 algorithms*, volume 6. MIT press Cambridge, 2001.
- 776 [11] D. M. Gordon. The evolution of the algorithms for collective behavior. *Cell Syst*, 3(6):514–520, Dec  
777 2016.
- 778 [12] D. M. Gordon. Local Regulation of Trail Networks of the Arboreal Turtle Ant, *Cephalotes goniodontus*.  
779 *Am. Nat.*, 190(6):E156–E169, 12 2017.
- 780 [13] Crispín Gomez, Francisco Gilabert, María Engracia Gomez, Pedro López, and José Duato. Deterministic  
781 versus adaptive routing in fat-trees. In *Parallel and Distributed Processing Symposium, 2007. IPDPS  
782 2007. IEEE International*, pages 1–8. IEEE, 2007.
- 783 [14] Eliza JT Middleton and Tanya Latty. Resilience in social insect infrastructure systems. *Journal of The  
784 Royal Society Interface*, 13(116):20151022, 2016.
- 785 [15] Miriam Malíčková, Christian Yates, and Katarína Boďová. A stochastic model of ant trail following  
786 with two pheromones. *arXiv:1508.06816*, 2015.
- 787 [16] Tatiana P Flanagan, Noa M Pinter-Wollman, Melanie E Moses, and Deborah M Gordon. Fast and  
788 flexible: Argentine ants recruit from nearby trails. *PloS one*, 8(8):e70888, 2013.
- 789 [17] Simon Garnier, Aurélie Guérécheau, Maud Combe, Vincent Fourcassié, and Guy Theraulaz. Path selec-  
790 tion and foraging efficiency in argentine ant transport networks. *Behavioral Ecology and Sociobiology*,  
791 63(8):1167–1179, 2009.
- 792 [18] Audrey Dussutour, Vincent Fourcassie, Dirk Helbing, and Jean-Louis Deneubourg. Optimal traffic  
793 organization in ants under crowded conditions. *Nature*, 428(6978):70–73, 2004.

- 794 [19] Jean-Louis Deneubourg, Simon Goss, Nigel Franks, and JM Pasteels. The blind leading the blind:  
795 modeling chemically mediated army ant raid patterns. *Journal of insect behavior*, 2(5):719–725, 1989.
- 796 [20] Daniel Cherix, Ph Werner, F Catzeflis, et al. Spatial organisation of a polycalic system in formica  
797 (coptoformica) exsecta nyl.(hymenoptera: Formicidae). *Mitteilungen der Schweizerischen Entomologis-*  
798 *chen Gesellschaft*, 53(2/3):163–172, 1980.
- 799 [21] Jean L Deneubourg, Serge Aron, SAPJM Goss, JM Pasteels, and Guido Duerinck. Random behaviour,  
800 amplification processes and number of participants: how they contribute to the foraging properties of  
801 ants. *Physica D: Nonlinear Phenomena*, 22(1):176–186, 1986.
- 802 [22] Nigel R Franks. Army ants: a collective intelligence. *American Scientist*, 77:138–145, 1989.
- 803 [23] Chris R Reid, Matthew J Lutz, Scott Powell, Albert B Kao, Iain D Couzin, and Simon Garnier. Army  
804 ants dynamically adjust living bridges in response to a cost–benefit trade-off. *Proceedings of the National*  
805 *Academy of Sciences*, 112(49):15113–15118, 2015.
- 806 [24] Duncan Jackson, Mike Holcombe, and Francis Ratnieks. Coupled computational simulation and empiri-  
807 cal research into the foraging system of pharaohs ant (monomorium pharaonis). *Biosystems*, 76(1):101–  
808 112, 2004.
- 809 [25] Duncan E. Jackson, Stephen J. Martin, Mike Holcombe, and Francis L.W. Ratnieks. Longevity and  
810 detection of persistent foraging trails in pharaoh’s ants, monomorium pharaonis (l.). *Animal Behaviour*,  
811 71(2):351 – 359, 2006.
- 812 [26] Elva JH Robinson, Duncan E Jackson, Mike Holcombe, and Francis LW Ratnieks. Insect communica-  
813 tion:no entrysignal in ant foraging. *Nature*, 438(7067):442–442, 2005.
- 814 [27] E JH Robinson, KE Green, EA Jenner, M Holcombe, and F LW Ratnieks. Decay rates of attractive  
815 and repellent pheromones in an ant foraging trail network. *Insectes sociaux*, 55(3):246–251, 2008.
- 816 [28] Elva JH Robinson, Francis LW Ratnieks, and M Holcombe. An agent-based model to investigate  
817 the roles of attractive and repellent pheromones in ant decision making during foraging. *Journal of*  
818 *Theoretical Biology*, 255(2):250–258, 2008.
- 819 [29] Alberto Colorni, Marco Dorigo, Vittorio Maniezzo, et al. Distributed optimization by ant colonies. In  
820 *Proceedings of the first European conference on artificial life*, volume 142, pages 134–142. Paris, France,  
821 1991.
- 822 [30] M. Dorigo and C. Blum. Ant colony optimization theory: A survey. *Theoretical Computer Science*,  
823 344(2-3):243–278, nov 2005.
- 824 [31] Manuel López-Ibáñez, Thomas Stützle, and Marco Dorigo. *Ant Colony Optimization: A Component-*  
825 *Wise Overview*, pages 1–37. Springer International Publishing, Cham, 2016.
- 826 [32] Luca Maria Gambardella, Roberto Montemanni, and Dennis Weyland. Coupling ant colony systems  
827 with strong local searches. *European Journal of Operational Research*, 220(3):831–843, 2012.
- 828 [33] Shigeyoshi Tsutsui. Ant colony optimization with cunning ants. *Transactions of the Japanese Society*  
829 *for Artificial Intelligence*, 22:29–36, 2007.
- 830 [34] Wolfram Wiesemann and Thomas Stützle. Iterated ants: An experimental study for the quadratic  
831 assignment problem. In *International Workshop on Ant Colony Optimization and Swarm Intelligence*,  
832 pages 179–190. Springer, 2006.
- 833 [35] Pierre Fraigniaud, David Ilcinkas, Guy Peer, Andrzej Pelc, and David Peleg. Graph exploration by a  
834 finite automaton. *Theoretical Computer Science*, 345(2):331–344, 2005.
- 835 [36] Nicolas Hanusse, Dimitris Kavvadias, Evangelos Kranakis, and Danny Krizanc. Memoryless search  
836 algorithms in a network with faulty advice. *Theoretical Computer Science*, 402(2):190–198, 2008.

- 837 [37] Israel A Wagner, Michael Lindenbaum, and Alfred M Bruckstein. Efficiently searching a graph by a  
838 smell-oriented vertex process. *Annals of Mathematics and Artificial Intelligence*, 24(1-4):211–223, 1998.
- 839 [38] O. Feinerman, A. Korman, Z. Lotker, and J.-S. Sereni. Collaborative search on the plane without  
840 communication. In *Proceedings of the 2012 ACM Symposium on Principles of Distributed Computing*,  
841 PODC '12, pages 77–86, New York, NY, USA, 2012. ACM.
- 842 [39] Y. Emek, T. Langner, D. Stolz, J. Uitto, and R. Wattenhofer. Towards More Realistic ANTS. In *2nd*  
843 *Workshop on Biological Distributed Algorithms (BDA)*, October 2014.
- 844 [40] C. Lenzen and T. Radeva. The power of pheromones in ant foraging. In *1st Workshop on Biological*  
845 *Distributed Algorithms (BDA)*, 2013.
- 846 [41] J. Kleinberg and E. Tardos. *Algorithm Design*. Addison-Wesley Longman Publishing Co., Inc., Boston,  
847 MA, USA, 2005.
- 848 [42] K Mani Chandy and Jayadev Misra. Distributed computation on graphs: Shortest path algorithms.  
849 *Communications of the ACM*, 25(11):833–837, 1982.
- 850 [43] Pierre A Humblet et al. Another adaptive distributed shortest path algorithm. *IEEE transactions on*  
851 *communications*, 39(6):995–1003, 1991.
- 852 [44] Radia Perlman. An algorithm for distributed computation of a spanningtree in an extended lan. In  
853 *ACM SIGCOMM Computer Communication Review*, volume 15, pages 44–53. ACM, 1985.
- 854 [45] Juan A Garay, Shay Kutten, and David Peleg. A sublinear time distributed algorithm for minimum-  
855 weight spanning trees. *SIAM Journal on Computing*, 27(1):302–316, 1998.
- 856 [46] Jukka Suomela. Survey of local algorithms. *ACM Computing Surveys (CSUR)*, 45(2):24, 2013.
- 857 [47] Yehuda Afek, Noga Alon, Ziv Bar-Joseph, Alejandro Cornejo, Bernhard Haeupler, and Fabian Kuhn.  
858 Beeping a maximal independent set. *Distributed computing*, 26(4):195–208, 2013.
- 859 [48] F. Merkl and S.W.W. Rolles. Linearly edge-reinforced random walks. In *Institute of Mathematical*  
860 *Statistics Lecture Notes - Monograph Series*, pages 66–77. Institute of Mathematical Statistics, 2006.
- 861 [49] Persi Diaconis and David Freedman. de finetti’s theorem for markov chains. *The Annals of Probability*,  
862 pages 115–130, 1980.
- 863 [50] Burgess Davis. Reinforced random walk. *Probability Theory and Related Fields*, 84(2):203–229, Jun  
864 1990.
- 865 [51] Angela Stevens and Hans G Othmer. Aggregation, blowup, and collapse: the abc’s of taxis in reinforced  
866 random walks. *SIAM Journal on Applied Mathematics*, 57(4):1044–1081, 1997.
- 867 [52] S Aron, Jacques M. Pasteels, and Jean Louis Deneubourg. Trail-laying behaviour during exploratory  
868 recruitment in the argentine ant, *Iridomyrmex humilis* (Mayr). *Biology of Behaviour*, 14:207–217, 1989.
- 869 [53] N. Pinter-Wollman, R. Wollman, A. Guetz, S. Holmes, and D. M. Gordon. The effect of individual  
870 variation on the structure and function of interaction networks in harvester ants. *J R Soc Interface*,  
871 8(64):1562–1573, Nov 2011.
- 872 [54] Danielle P Mersch, Alessandro Crespi, and Laurent Keller. Tracking individuals shows spatial fidelity  
873 is a key regulator of ant social organization. *Science*, 340(6136):1090–1093, 2013.
- 874 [55] Deborah M Gordon. The expandable network of ant exploration. *Animal Behaviour*, 50(4):995–1007,  
875 1995.
- 876 [56] Raphaël Jeanson, Francis LW Ratnieks, and Jean-Louis Deneubourg. Pheromone trail decay rates on  
877 different substrates in the pharaoh’s ant, *monomorium pharaonis*. *Physiological Entomology*, 28(3):192–  
878 198, 2003.

- 879 [57] T Simon and A Hefetz. Trail-following responses oftapinoma simrothi (formicidae: Dolichoderinae) to  
880 pygidial gland extracts. *Insectes Sociaux*, 38(1):17–25, 1991.
- 881 [58] Andrea Perna, Boris Granovskiy, Simon Garnier, Stamatios C Nicolis, Marjorie Labédan, Guy Ther-  
882 aulaz, Vincent Fourcassié, and David JT Sumpter. Individual rules for trail pattern formation in  
883 argentine ants (linepithema humile). *PLoS computational biology*, 8(7):e1002592, 2012.
- 884 [59] Jean-Louis Deneubourg, Jacques M Pasteels, and Jean-Claude Verhaeghe. Probabilistic behaviour in  
885 ants: a strategy of errors? *Journal of Theoretical Biology*, 105(2):259–271, 1983.
- 886 [60] Ehud Fonio, Yael Heyman, Lucas Boczkowski, Aviram Gelblum, Adrian Kosowski, Amos Korman,  
887 and Ofer Feinerman. A locally-blazed ant trail achieves efficient collective navigation despite limited  
888 information. *eLife*, 5:e20185, 2016.
- 889 [61] David JT Sumpter and Madeleine Beekman. From nonlinearity to optimality: pheromone trail foraging  
890 by ants. *Animal behaviour*, 66(2):273–280, 2003.
- 891 [62] Jrme Kunegis. KONECT – The Koblenz Network Collection. In *Proc. Int. Conf. on World Wide Web*  
892 *Companion*, pages 1343–1350, 2013.
- 893 [63] K. Lund, A. J. Manzo, N. Dabby, N. Michelotti, A. Johnson-Buck, J. Nangreave, S. Taylor, R. Pei,  
894 M. N. Stojanovic, N. G. Walter, E. Winfree, and H. Yan. Molecular robots guided by prescriptive  
895 landscapes. *Nature*, 465(7295):206–210, May 2010.
- 896 [64] M. Brambilla, E. Ferrante, M. Birattari, and M. Dorigo. Swarm robotics: a review from the swarm  
897 engineering perspective. *Swarm Intell*, 7(1):1–41, jan 2013.
- 898 [65] J. Werfel, K. Petersen, and R. Nagpal. Designing collective behavior in a termite-inspired robot con-  
899 struction team. *Science*, 343(6172):754–758, Feb 2014.
- 900 [66] Joshua P Hecker and Melanie E Moses. Beyond pheromones: evolving error-tolerant, flexible, and  
901 scalable ant-inspired robot swarms. *Swarm Intelligence*, 9(1):43–70, 2015.
- 902 [67] C. Korn and H. G. Augustin. Mechanisms of Vessel Pruning and Regression. *Dev. Cell*, 34(1):5–17, Jul  
903 2015.
- 904 [68] Balaji Prabhakar, Katherine N Dektar, and Deborah M Gordon. The regulation of ant colony foraging  
905 activity without spatial information. *PLoS Comput Biol*, 8(8):e1002670, 2012.
- 906 [69] Tomer J Czaczkes, Christoph Grüter, and Francis LW Ratnieks. Trail pheromones: an integrative view  
907 of their role in social insect colony organization. *Annual review of entomology*, 60:581–599, 2015.
- 908 [70] Saket Navlakha and Ziv Bar-Joseph. Distributed information processing in biological and computational  
909 systems. *Commun. ACM*, 58(1):94–102, December 2014.
- 910 [71] Tomer J Czaczkes, Christoph Grüter, and Francis LW Ratnieks. Negative feedback in ants: crowding  
911 results in less trail pheromone deposition. *Journal of the Royal Society Interface*, 10(81):20121009, 2013.

## 912 Author Contributions

913 AC and SN performed the computational experiments. DMG performed the field experiments. All  
914 authors wrote and reviewed the manuscript.

## 915 Competing Interests

916 The authors declare no competing interests.
